# Supplementary material for: Relationship between electrochemical potentials and substitution reaction rates of ferrocene-containing β-diketonato rhodium(i) complexes; Cytotoxicity of [Rh(FcCOCHCOPh)(cod)]
Source: Royal Society of Chemistry journal article supplement (doi:10.1039/c1dt00013f), 2011-01-01
Supplement: c1dt00013f.pdf [file c1dt00013f.pdf]

### Supporting Information

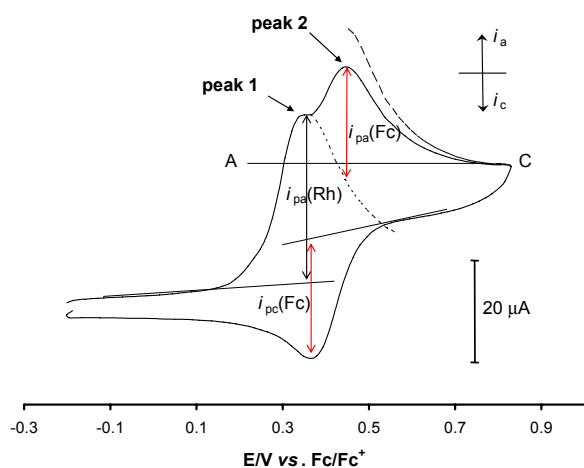

Figure S1: The decay current of rhodium(I) oxidation (peak 1) is estimated by multiplying the decaying current of Fc oxidation (peak 2) from the basis line AC with the ratio  $i_{pa}(Rh)/i_{pc}(Fc)$  to allow for the two electron flow during rhodium(I) oxidation as compared to the one electron flow during Fc oxidation. The artificially obtained line is shown as ----- . This line is then translatorily shifted without distortion to coincide exactly with the  $E_{pa}$  value of the rhodium(I) oxidation peak (peak 1) and is indicated by ..... The anodic peak current  $i_{pa}(Fc)$  of the ferrocenyl group can then be measured as the current between peak 2 and the newly obtained anodic decay current for rhodium(I) oxidation. This method is used since both Rh and Fc are part of the same complex, implying that the diffusion rate of rhodium(I) and Fc should be the same even though rhodium(I) oxidation represents a two electron and Fc a one electron process (the molecule does not divide in any way to allow different diffusion rates for the Rh and Fc fragments).

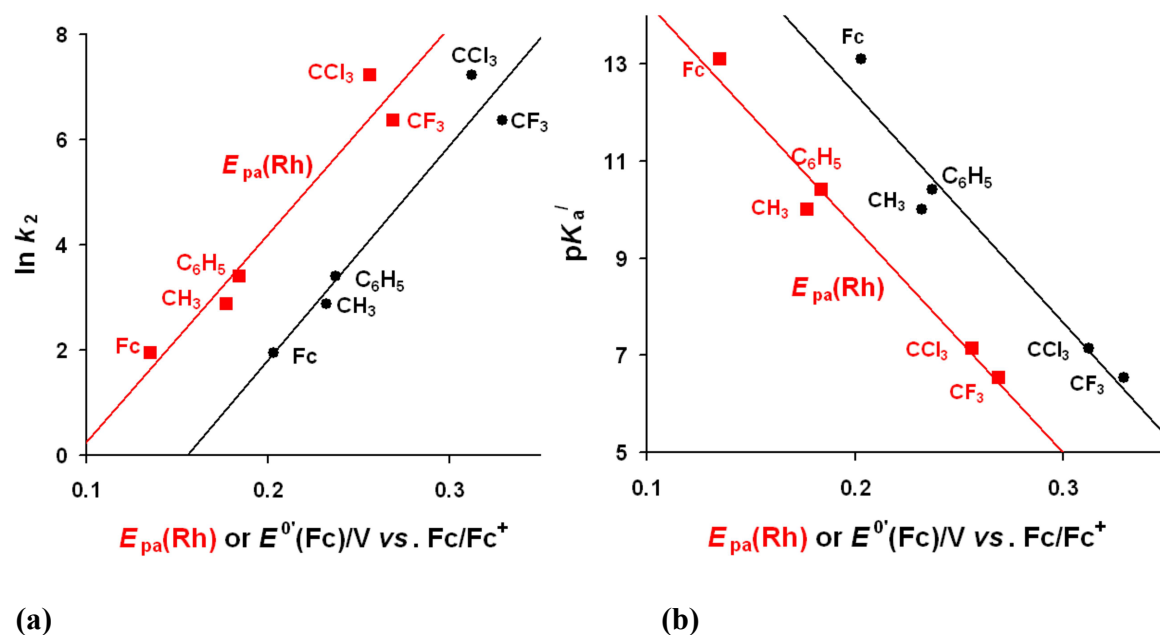

Figure S2: (a) Linear dependence of the  $\ln$  of the second-order rate constant of the substitution of the  $(\text{FcCOCHCOR})^-$  ligand with phen from  $[\text{Rh}(\text{FcCOCHCOR})(\text{cod})]$ ,  $\ln k_2$ , and  $E_{pa}(\text{Rh})$  (top) or  $E^{o'}(\text{Fc})$  (bottom) in  $[\text{Rh}(\text{FcCOCHCOR})(\text{cod})]$ . (b) The relationship between  $E^{o'}(\text{Fc})$  (top) or  $E_{pa}(\text{Rh})$  (bottom) of  $[\text{Rh}(\text{FcCOCHCOR})(\text{cod})]$  and the  $pK_a'$  of the free uncoordinated  $\text{FcCOCH}_2\text{COR}$  ligand. R is indicated on the graph.

Table S1: Electrochemical data and conditions for complexes **1** - **5** measured in 0.1 mol dm<sup>-3</sup> [N(<sup>n</sup>Bu<sub>4</sub>)]PF<sub>6</sub>/CH<sub>3</sub>CN on a glassy carbon electrode at 25.0(1) °C vs. Fc/Fc<sup>+</sup>. The concentration of **3** was 0.7 mmol dm<sup>-3</sup>, other complexes had concentration 1.0 mmol dm<sup>-3</sup>.

| v/m<br>Vs <sup>-1</sup> | rhodium                                       |                        | ferrocenyl group      |                        |                        |                         |                                  | rhodium                                                     |                        | Ferrocenyl group      |                        |                        |                         |                                  |
|-------------------------|-----------------------------------------------|------------------------|-----------------------|------------------------|------------------------|-------------------------|----------------------------------|-------------------------------------------------------------|------------------------|-----------------------|------------------------|------------------------|-------------------------|----------------------------------|
|                         | E <sub>pa</sub><br>/V                         | i <sub>pa</sub><br>/μA | E <sub>pa</sub><br>/V | ΔE <sub>p</sub><br>/mV | E <sup>o''</sup><br>/V | i <sub>pc</sub> /<br>μA | i <sub>pc</sub> /i <sub>pa</sub> | E <sub>pa</sub><br>/V                                       | i <sub>pa</sub><br>/μA | E <sub>pa</sub><br>/V | ΔE <sub>p</sub><br>/mV | E <sup>o''</sup><br>/V | i <sub>pc</sub> /<br>μA | i <sub>pc</sub> /i <sub>pa</sub> |
|                         | [Rh(FcCOCHCOCF <sub>3</sub> )(cod)], <b>1</b> |                        |                       |                        |                        |                         |                                  | [Rh(FcCOCHCOC <sub>6</sub> H <sub>5</sub> )(cod)], <b>4</b> |                        |                       |                        |                        |                         |                                  |
| 50                      | 0.255                                         | 23                     | 0.368                 | 75                     | 0.329                  | 17                      | 0.98                             | 0.172                                                       | 24                     | 0.271                 | 67                     | 0.237                  | 18                      | 0.98                             |
| 100                     | 0.269                                         | 33                     | 0.369                 | 79                     | 0.329                  | 24                      | 1.02                             | 0.184                                                       | 34                     | 0.273                 | 74                     | 0.237                  | 25                      | 0.97                             |
| 150                     | 0.281                                         | 39                     | 0.372                 | 88                     | 0.328                  | 28                      | 1.01                             | 0.189                                                       | 42                     | 0.277                 | 79                     | 0.237                  | 31                      | 0.98                             |
| 200                     | 0.281                                         | 46                     | 0.372                 | 91                     | 0.327                  | 32                      | 1.04                             | 0.197                                                       | 48                     | 0.279                 | 85                     | 0.237                  | 36                      | 0.98                             |
|                         | [Rh(FcCOCHCOCl <sub>3</sub> )(cod)], <b>2</b> |                        |                       |                        |                        |                         |                                  | [Rh(FcCOCHCOFc)(cod)], <b>5</b><br>first ferrocenyl group   |                        |                       |                        |                        |                         |                                  |
| 50                      | 0.244                                         | 24                     | 0.355                 | 92                     | 0.309                  | 19                      | 0.98                             | 0.123                                                       | 15                     | 0.233                 | 64                     | 0.201                  | *                       | *                                |
| 100                     | 0.256                                         | 33                     | 0.360                 | 95                     | 0.312                  | 25                      | 0.98                             | 0.135                                                       | 25                     | 0.238                 | 71                     | 0.203                  | *                       | *                                |
| 150                     | 0.264                                         | 40                     | 0.352                 | 98                     | 0.313                  | 29                      | 0.98                             | 0.142                                                       | 33                     | 0.240                 | 76                     | 0.202                  | *                       | *                                |
| 200                     | 0.268                                         | 46                     | 0.361                 | 100                    | 0.311                  | 33                      | 1.00                             | 0.145                                                       | 39                     | 0.243                 | 81                     | 0.203                  | *                       | *                                |
|                         | [Rh(FcCOCHCOCH <sub>3</sub> )(cod)], <b>3</b> |                        |                       |                        |                        |                         |                                  | [Rh(FcCOCHCOFc)(cod)], <b>5</b><br>second ferrocenyl group  |                        |                       |                        |                        |                         |                                  |
| 50                      | 0.170                                         | 19                     | 0.268                 | 71                     | 0.232                  | 12                      | 0.98                             | -                                                           | -                      | 0.343                 | 81                     | 0.303                  | 13                      | *                                |
| 100                     | 0.177                                         | 29                     | 0.270                 | 76                     | 0.232                  | 17                      | 1.02                             | -                                                           | -                      | 0.346                 | 88                     | 0.302                  | 23                      | *                                |
| 150                     | 0.187                                         | 36                     | 0.270                 | 78                     | 0.232                  | 21                      | 1.00                             | -                                                           | -                      | 0.347                 | 92                     | 0.301                  | 28                      | *                                |
| 200                     | 0.192                                         | 42                     | 0.270                 | 81                     | 0.23                   | 25                      | 0.99                             | -                                                           | -                      | 0.348                 | 95                     | 0.300                  | 31                      | *                                |

\* not accurately determinable
